# Supplementary material for: Lower Emotional Exhaustion among Employees Is Associated with Intentional Incorporation of Animals into Residential Care Settings
Source: MDPI journal article supplement (doi:10.3390/bs13050421), 2023-05-16
Supplement: s1 [file s1]

Table S1. Animal-related and demographic question subset of annual organizational culture survey questions for residential care centers.

| <i>Animal Questions</i>                                                                                                                                                                                                                                                                                                                                                                                                                                             |                                                    |                                                   |                                                    |                                       |
|---------------------------------------------------------------------------------------------------------------------------------------------------------------------------------------------------------------------------------------------------------------------------------------------------------------------------------------------------------------------------------------------------------------------------------------------------------------------|----------------------------------------------------|---------------------------------------------------|----------------------------------------------------|---------------------------------------|
| <b>Are animals incorporated into your residential programming?</b>                                                                                                                                                                                                                                                                                                                                                                                                  |                                                    |                                                   |                                                    |                                       |
| <ul style="list-style-type: none"> <li>○ Animals have no role in our residential programming</li> <li>○ Animals are a formal part of the care plans on site</li> <li>○ Animals are a formal part of the care plans through linkage to external programs</li> <li>○ Animals are part of the environment, but not used or incorporated into care plans</li> <li>○ Animals are part of our care plans when providers offer us an opportunity to participate</li> </ul> |                                                    |                                                   |                                                    |                                       |
|                                                                                                                                                                                                                                                                                                                                                                                                                                                                     | This animal is not part of residential programming | This animal is housed at the residential facility | This animal is brought to the residential facility | Youth travel to the animal's location |
| <b>Are DOGS part of your residential programming?</b>                                                                                                                                                                                                                                                                                                                                                                                                               |                                                    |                                                   |                                                    |                                       |
| <b>Are CATS part of your residential programming?</b>                                                                                                                                                                                                                                                                                                                                                                                                               |                                                    |                                                   |                                                    |                                       |
| <b>Are FISH part of your residential programming?</b>                                                                                                                                                                                                                                                                                                                                                                                                               |                                                    |                                                   |                                                    |                                       |
| <b>Are REPTILES part of your residential programming?</b>                                                                                                                                                                                                                                                                                                                                                                                                           |                                                    |                                                   |                                                    |                                       |
| <b>Are SMALL FARM ANIMALS (e.g., sheep, chickens, ducks, goats) part of your residential programming?</b>                                                                                                                                                                                                                                                                                                                                                           |                                                    |                                                   |                                                    |                                       |
| <b>Are LARGE FARM ANIMALS (e.g., horses, beef or milk cattle) part of your residential programming?</b>                                                                                                                                                                                                                                                                                                                                                             |                                                    |                                                   |                                                    |                                       |
| <b>Are OTHER SMALL ANIMALS (e.g., hamsters, rabbits) part of your residential programming?</b>                                                                                                                                                                                                                                                                                                                                                                      |                                                    |                                                   |                                                    |                                       |
| <b>Other (please specify)</b>                                                                                                                                                                                                                                                                                                                                                                                                                                       |                                                    |                                                   |                                                    |                                       |

**Please select in which years animals have been a part of the residential programming (select all that apply):**

- ☐ 2012
- ☐ 2013
- ☐ 2014
- ☐ 2015
- ☐ 2016
- ☐ 2017
- ☐ 2018
- ☐ 2019
- ☐ 2020
- ☐ 2021

**What percentage of youth in your program participate with animals?**

- ☐ 75-100%
- ☐ 50-74%
- ☐ 25-49%
- ☐ Less than 25%

**How are youth in services participating in animal-assisted programs?**

- ☐ Groups
- ☐ Individually

**How often do youth interact with animals as a formal part of their care plan?**

- ☐ Daily
- ☐ Weekly
- ☐ Monthly
- ☐ As needed (please specify)

---

***Demographic Questions***

---

**Please select the job type that best describes you:**

- ☐ Direct Service
- ☐ Administration

**Which shift do you work?**

- ☐ First Shift
- ☐ Second Shift
- ☐ Third Shift
- ☐ Variable hours (I do not work a specific shift)

**How long have you worked at this facility?**

- ☐ 0-3 months
- ☐ 4-6 months
- ☐ 7-9 months
- ☐ 10-12 months
- ☐ 1 to 3 years
- ☐ 4 to 5 years
- ☐ 6 to 10 years
- ☐ 11 to 15 years
- ☐ 16 to 20 years
- ☐ 21 years or more

**How long have you worked in your current position?**

- ☐ 0-3 months
- ☐ 4-6 months
- ☐ 7-9 months
- ☐ 10-12 months
- ☐ 1 to 3 years
- ☐ 4 to 5 years
- ☐ 6 to 10 years
- ☐ 11 to 15 years
- ☐ 16 to 20 years
- ☐ 21 years or more

**Typically how many hours per week do you work?**

40

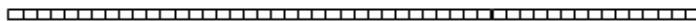

*(Place a mark on the scale above)*

**What is your age?**

- ☐ 18-24
- ☐ 25-34
- ☐ 35-44
- ☐ 45-54
- ☐ 55+

**What is your highest level of education?**

- ☐ High school or GED
- ☐ Bachelors: BSW
- ☐ Bachelors: other field
- ☐ Masters: MSW
- ☐ Masters: other field
- ☐ Doctorate: DSW or PhD in social work
- ☐ Doctorate: other field

**Please select the gender identify with which you most identify:**

- ☐ Female
- ☐ Male
- ☐ Transgender Female
- ☐ Transgender Male
- ☐ Gender diverse, gender expansive, gender non-binary, or genderqueer
- ☐ Intersex
- ☐ None of these describe me
- ☐ Decline to answer

**Please select the sexual orientation with which you most identify:**

- ☐ Asexual
- ☐ Bisexual
- ☐ Gay or lesbian
- ☐ Heterosexual
- ☐ Pansexual
- ☐ Queer
- ☐ None of these describe me
- ☐ Decline to answer

**Please select the race with which you most identify:**

- ☐ American Indian or Alaska Native
- ☐ Asian
- ☐ Black or African American
- ☐ Native Hawaiian or Other Pacific Islander
- ☐ White or Caucasian
- ☐ Multiracial
- ☐ None of these apply to me
- ☐ Decline to answer

### *Organizational Culture Questions*

#### **Emotional Exhaustion**

|                                                                              | Very Strongly Disagree | Strongly Disagree     | Disagree              | Neutral               | Agree                 | Strongly Agree        | Very Strongly Agree   |
|------------------------------------------------------------------------------|------------------------|-----------------------|-----------------------|-----------------------|-----------------------|-----------------------|-----------------------|
| I feel burned out from my work.                                              | <input type="radio"/>  | <input type="radio"/> | <input type="radio"/> | <input type="radio"/> | <input type="radio"/> | <input type="radio"/> | <input type="radio"/> |
| I dread getting up in the morning and having to face another day on the job. | <input type="radio"/>  | <input type="radio"/> | <input type="radio"/> | <input type="radio"/> | <input type="radio"/> | <input type="radio"/> | <input type="radio"/> |
| I feel emotionally drained from my work.                                     | <input type="radio"/>  | <input type="radio"/> | <input type="radio"/> | <input type="radio"/> | <input type="radio"/> | <input type="radio"/> | <input type="radio"/> |
| I feel used up at the end of the work day.                                   | <input type="radio"/>  | <input type="radio"/> | <input type="radio"/> | <input type="radio"/> | <input type="radio"/> | <input type="radio"/> | <input type="radio"/> |

**Mindful Organizing—when completing this portion think about your “unit/team” as the facility in which you work**

[illegible]

**Psychological Safety—when completing this portion think about your “unit/team” as the facility in which you work**

|                                                                         | Very Strongly Disagree | Strongly Disagree     | Disagree              | Neutral               | Agree                 | Strongly Agree        | Very Strongly Agree   |
|-------------------------------------------------------------------------|------------------------|-----------------------|-----------------------|-----------------------|-----------------------|-----------------------|-----------------------|
| If you make a mistake on my team, it is often held against you.         | <input type="radio"/>  | <input type="radio"/> | <input type="radio"/> | <input type="radio"/> | <input type="radio"/> | <input type="radio"/> | <input type="radio"/> |
| The people on my team value each other's unique skills and talents.     | <input type="radio"/>  | <input type="radio"/> | <input type="radio"/> | <input type="radio"/> | <input type="radio"/> | <input type="radio"/> | <input type="radio"/> |
| Members of my team are able to bring up concerns and challenges.        | <input type="radio"/>  | <input type="radio"/> | <input type="radio"/> | <input type="radio"/> | <input type="radio"/> | <input type="radio"/> | <input type="radio"/> |
| It is safe to take an interpersonal risk on my team.                    | <input type="radio"/>  | <input type="radio"/> | <input type="radio"/> | <input type="radio"/> | <input type="radio"/> | <input type="radio"/> | <input type="radio"/> |
| On this team, people are sometimes rejected for having different ideas. | <input type="radio"/>  | <input type="radio"/> | <input type="radio"/> | <input type="radio"/> | <input type="radio"/> | <input type="radio"/> | <input type="radio"/> |
| It is difficult to ask other members of this team for help.             | <input type="radio"/>  | <input type="radio"/> | <input type="radio"/> | <input type="radio"/> | <input type="radio"/> | <input type="radio"/> | <input type="radio"/> |

**Workplace Safety**

|                                                                                                                                 | Very Strongly Disagree | Strongly Disagree     | Disagree              | Neutral               | Agree                 | Strongly Agree        | Very Strongly Agree   |
|---------------------------------------------------------------------------------------------------------------------------------|------------------------|-----------------------|-----------------------|-----------------------|-----------------------|-----------------------|-----------------------|
| I feel safe going to and from my workplace on a daily basis (i.e., I feel safe in the community where the facility is located). | <input type="radio"/>  | <input type="radio"/> | <input type="radio"/> | <input type="radio"/> | <input type="radio"/> | <input type="radio"/> | <input type="radio"/> |
| I feel safe in my work environment.                                                                                             | <input type="radio"/>  | <input type="radio"/> | <input type="radio"/> | <input type="radio"/> | <input type="radio"/> | <input type="radio"/> | <input type="radio"/> |
| Employee safety is important in my organization.                                                                                | <input type="radio"/>  | <input type="radio"/> | <input type="radio"/> | <input type="radio"/> | <input type="radio"/> | <input type="radio"/> | <input type="radio"/> |
| I feel that I am protected in my work setting.                                                                                  | <input type="radio"/>  | <input type="radio"/> | <input type="radio"/> | <input type="radio"/> | <input type="radio"/> | <input type="radio"/> | <input type="radio"/> |

**Workplace Connectedness**

[illegible]
